# Supplementary material
Source: Springer Nature journal article supplement (https://www.springermedizin.de/resource/supplementary/12985_2009_762_MOESM10_ESM.pdf/9608730)
Supplement: MOESM10 [file 9608730]

**(A)**

ORF3

|          |     |     |     |     |     |     |     |     |     |     |     |            |     |     |     |     |     |     |     |     |     |       |      |
|----------|-----|-----|-----|-----|-----|-----|-----|-----|-----|-----|-----|------------|-----|-----|-----|-----|-----|-----|-----|-----|-----|-------|------|
| EU420137 | GUA | AUG | UGG | GGU | GGU | CUC | UUU | CAG | UUG | CAA | UUU | <u>GAA</u> | AAA | GCU | CUU | AUC | AGU | AUU | AAC | UCU | GAU | BtCoV | 1B   |
| EU420138 | GUG | AUG | UGG | GGC | GGU | CUC | UUC | CAG | UUG | CAG | UUU | GAA        | AAA | GCA | CUU | AGC | AGU | AUC | AAC | UCU | GAU | BtCoV | 1A   |
| EU420139 | GUA | AUG | UUU | GGU | GGC | CUU | UUC | ACU | UAU | UCU | AUU | GAA        | UCA | GUU | CGU | ACU | GCA | GUA | AAG | --- | GAA | BtCoV | HKU8 |

  

ORFX

|          |     |     |     |     |     |     |     |     |     |     |     |     |     |     |     |     |     |     |     |     |     |       |      |
|----------|-----|-----|-----|-----|-----|-----|-----|-----|-----|-----|-----|-----|-----|-----|-----|-----|-----|-----|-----|-----|-----|-------|------|
| EU420137 | CUC | AAG | UUA | CCA | GAA | GAG | CAU | UUG | AAA | GUG | GUU | GAG | UCG | CAU | CUC | GCA | CCC | AUC | CAU | UAU | GCA | BtCoV | 1B   |
| EU420138 | CUU | AAU | UUG | CCU | AAA | GAG | CAU | UUG | AAA | GUG | GUU | GAG | UCU | CAU | CUC | GCA | CCC | AUU | CAU | UAU | GCA | BtCoV | 1A   |
| EU420139 | CUU | GAU | UUG | CCA | CCU | GCU | AAA | GAG | CAU | GAU | CUC | CUU | GAA | CAU | GUU | GUG | CCU | GUG | GCU | CAU | GCA | BtCoV | HKU8 |

**(B)**

EU420137 (nt 25484..25759) Bat coronavirus 1B  
 MQRLHWATFL LVSLWCILHY LKQTPIEAIL CVSFLGLHLY FCIVLCCYTM DHLMLVHLLQ LSLLVESVRH CILLFVIRTL  
 PLLFLIPALW LP
